# Supplementary material for: Exosomal circWDR62 promotes temozolomide resistance and malignant progression through regulation of the miR-370-3p/MGMT axis in glioma
Source: PubMed Central journal article supplement (PMC9273787; doi:10.1038/s41419-022-05056-5), 2022-07-11

CD63 (Figure1)

CD63 26kDa -

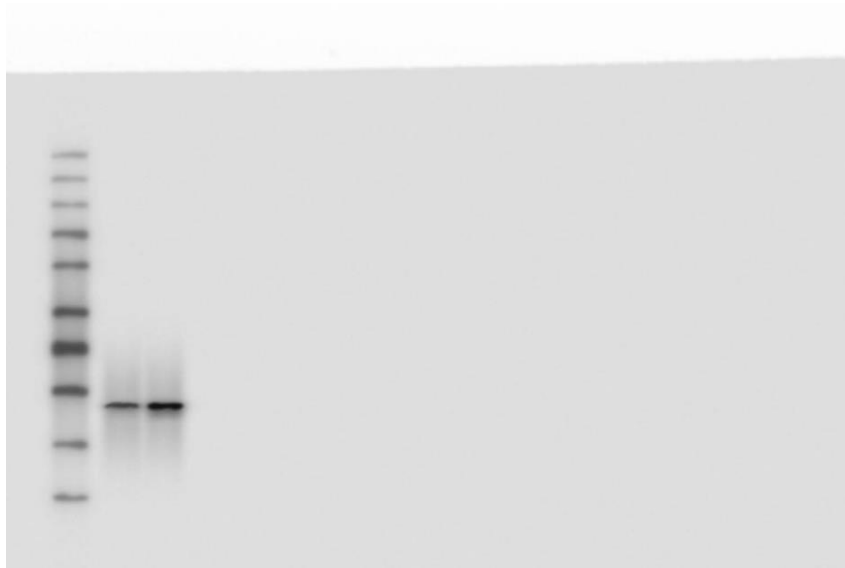

TSG101 (Figure1)

TSG101 44kDa -

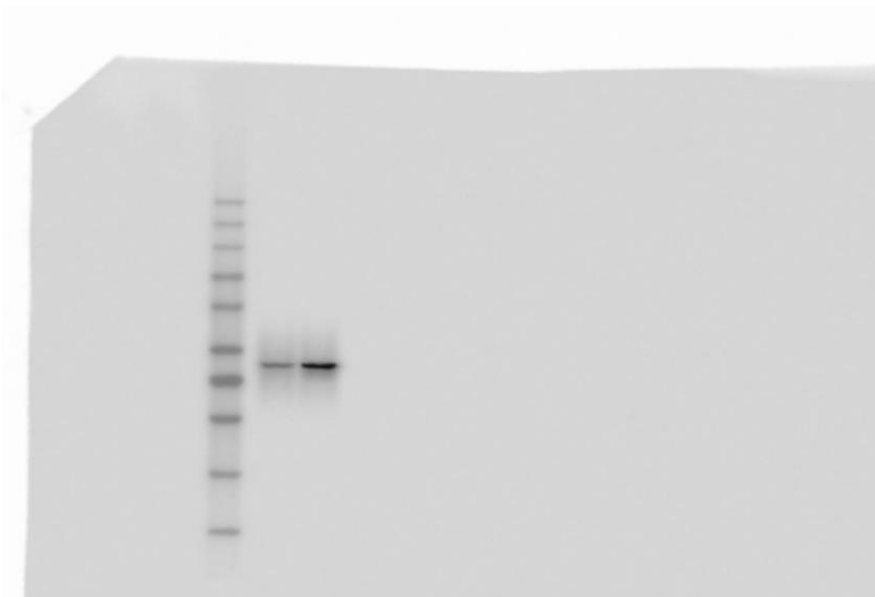

PCNA—U343-R (Figure3)

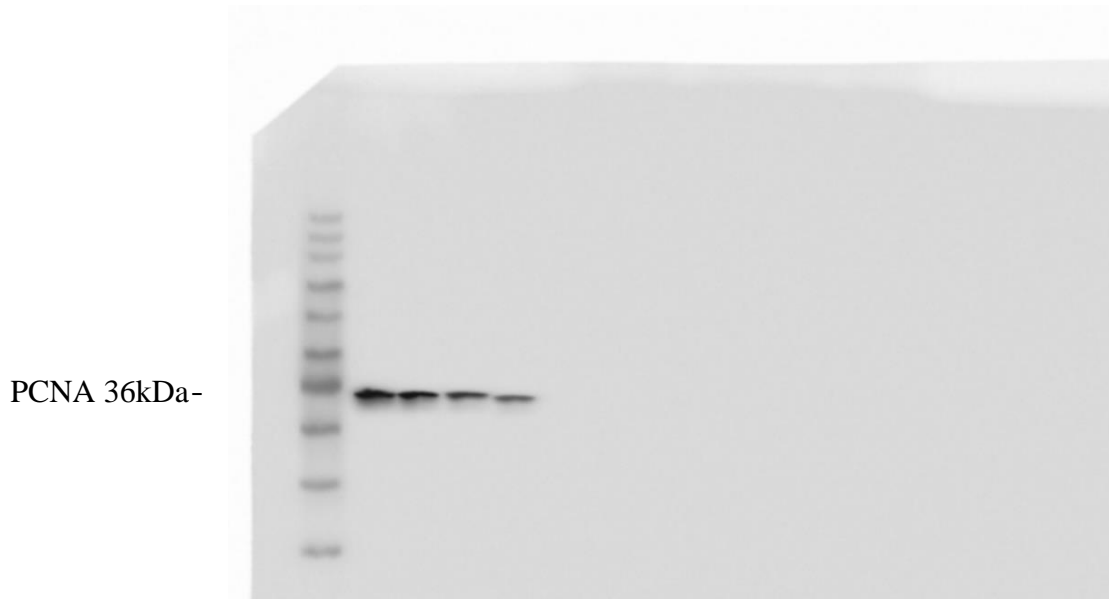

PCNA—U251-R (Figure3)

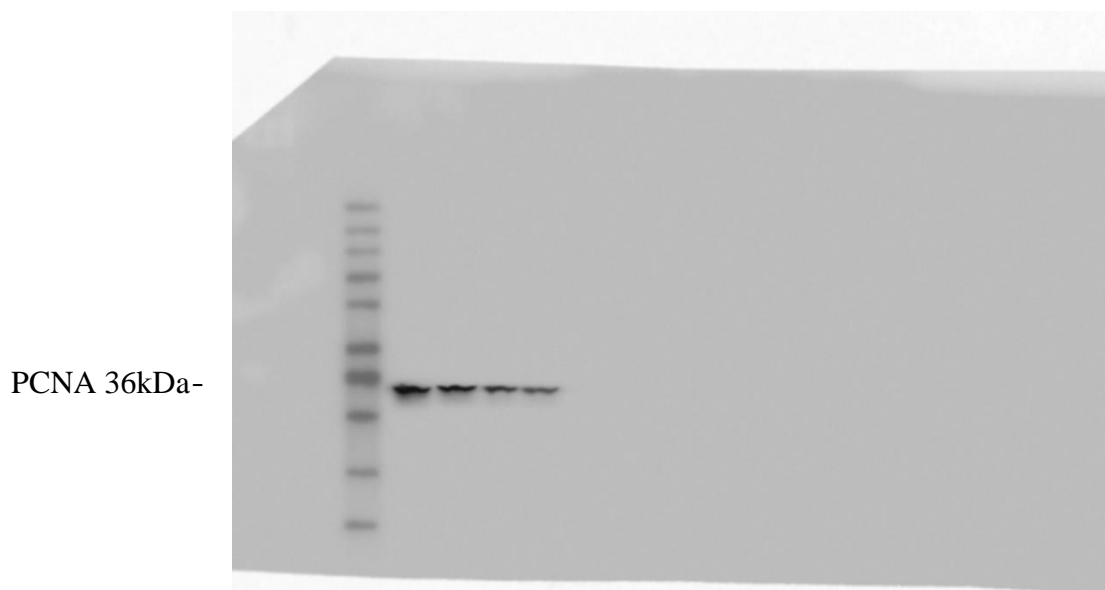

GAPDH—U343-R (Figure3)

GAPDH 36kDa-

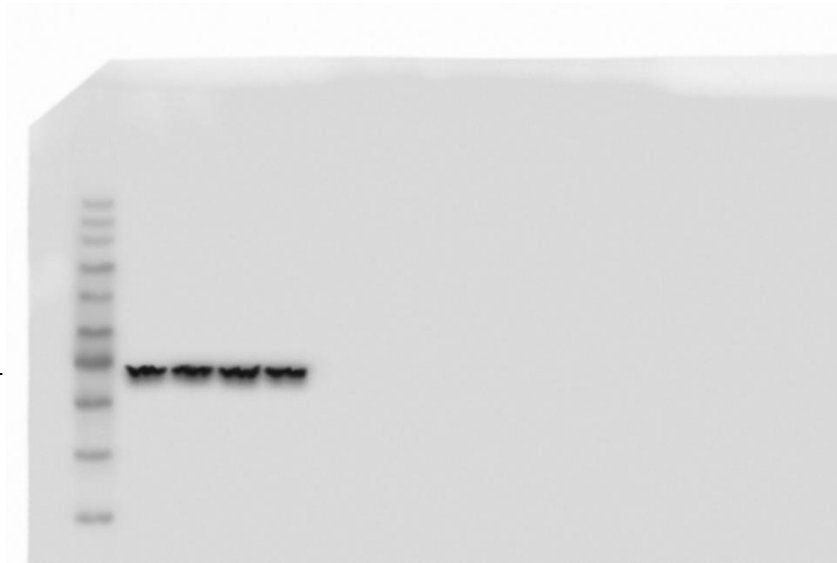

GAPDH—U251-R (Figure3)

GAPDH 36kDa-

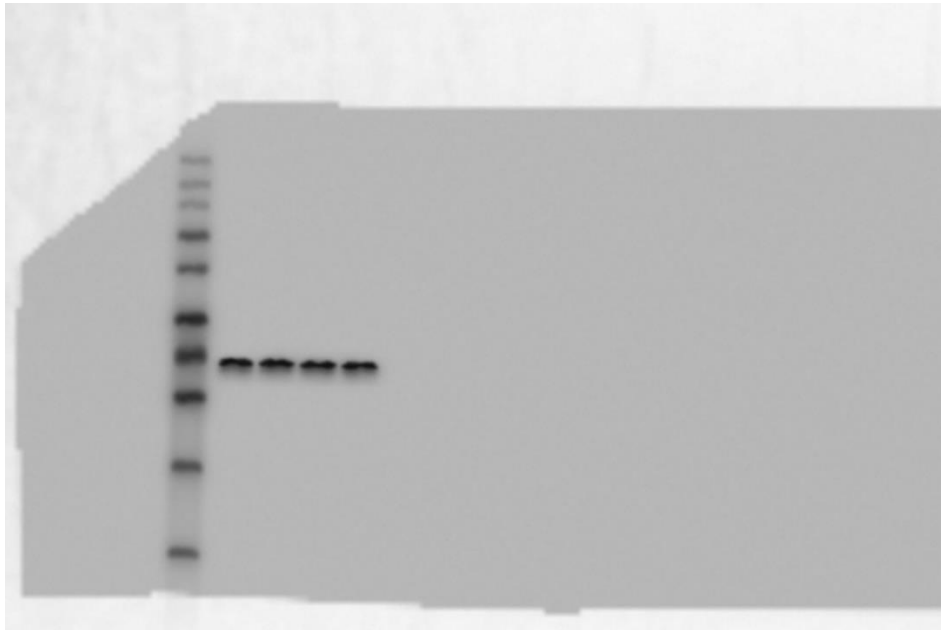

E-cadherin--U343-R (Figure3)

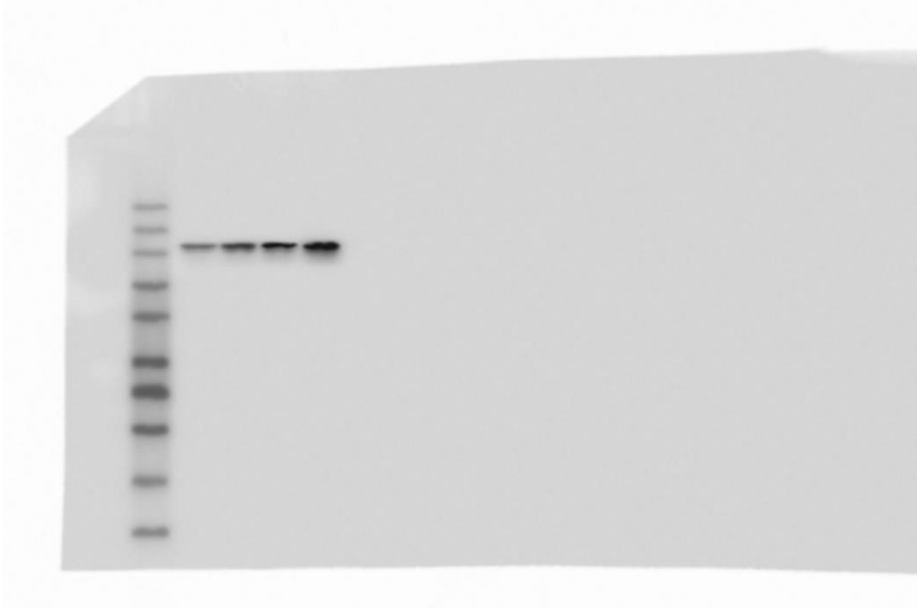

E-cadherin--U343-R (Figure3)

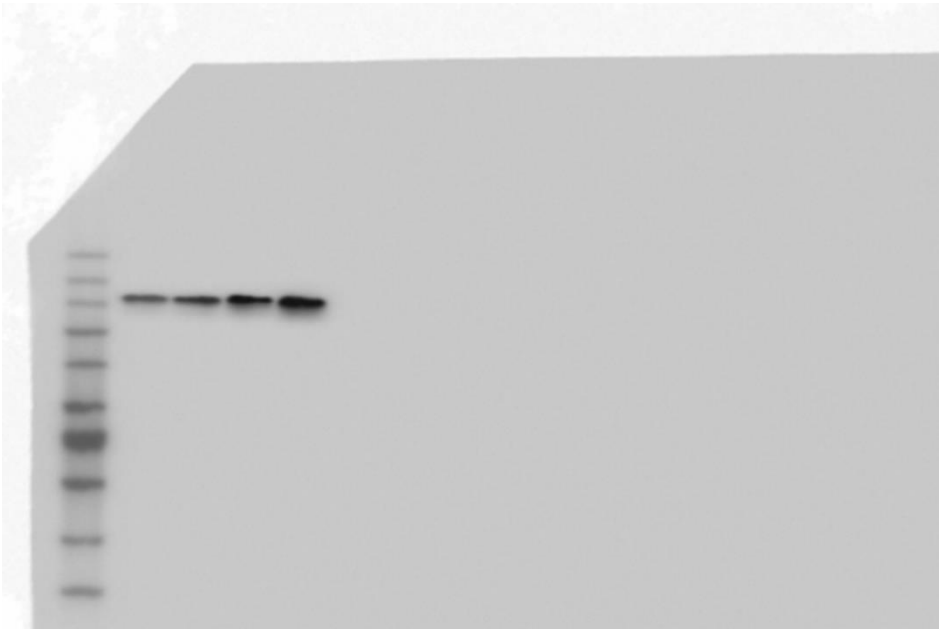

GAPDH—U343-R (Figure3)

GAPDH 36kDa-

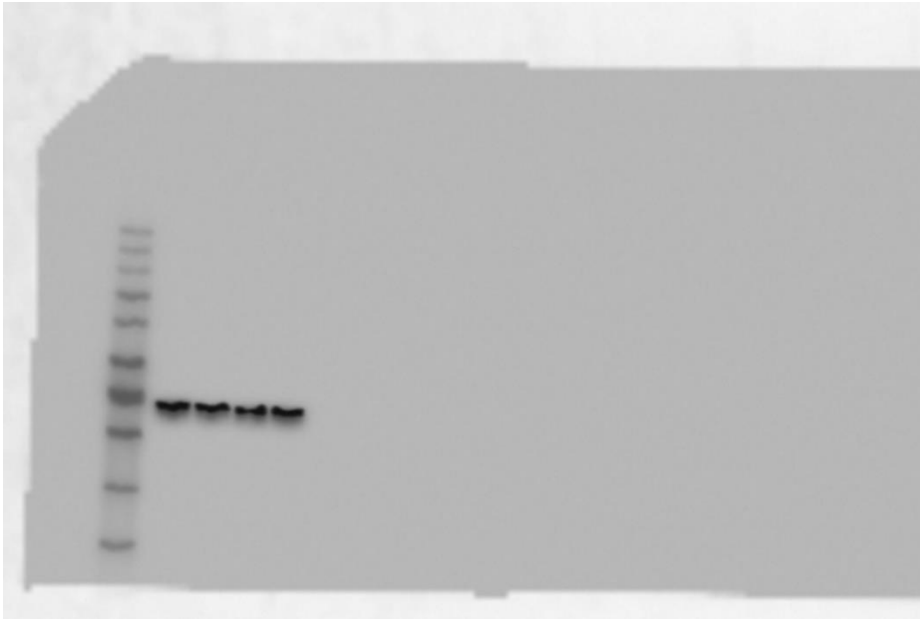

GAPDH—U251-R (Figure3)

GAPDH 36kDa-

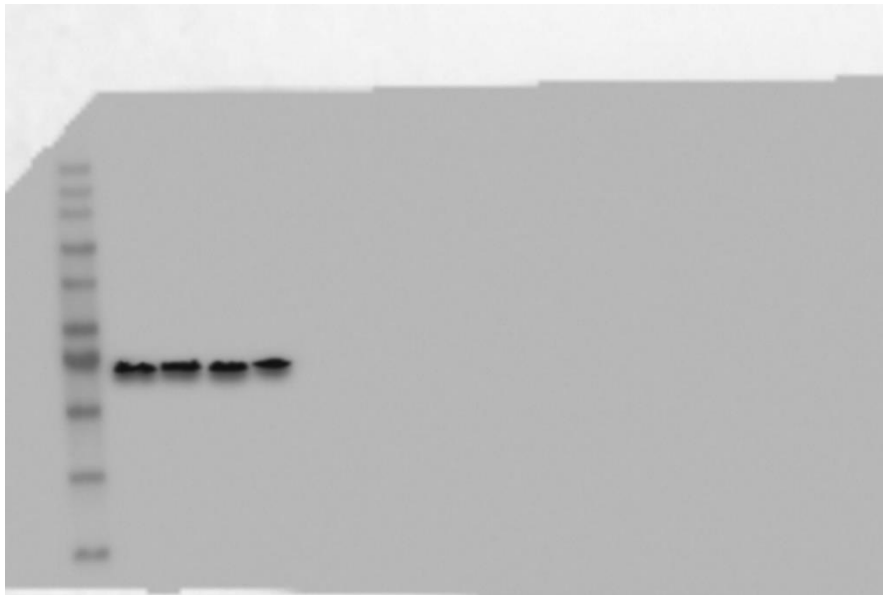

N-cadherin—U343-R (Figure3)

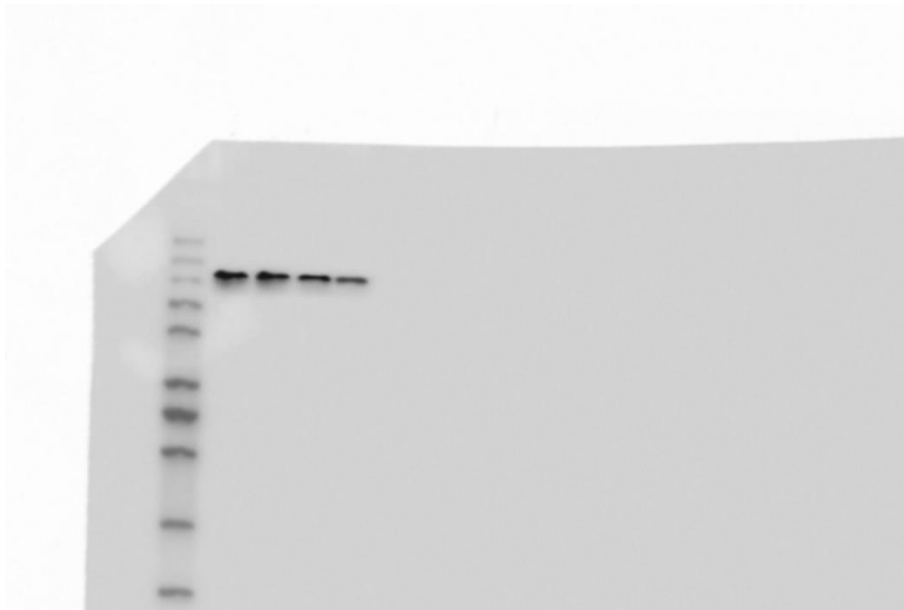

N-cadherin 140kDa-

N-cadherin—U251-R (Figure3)

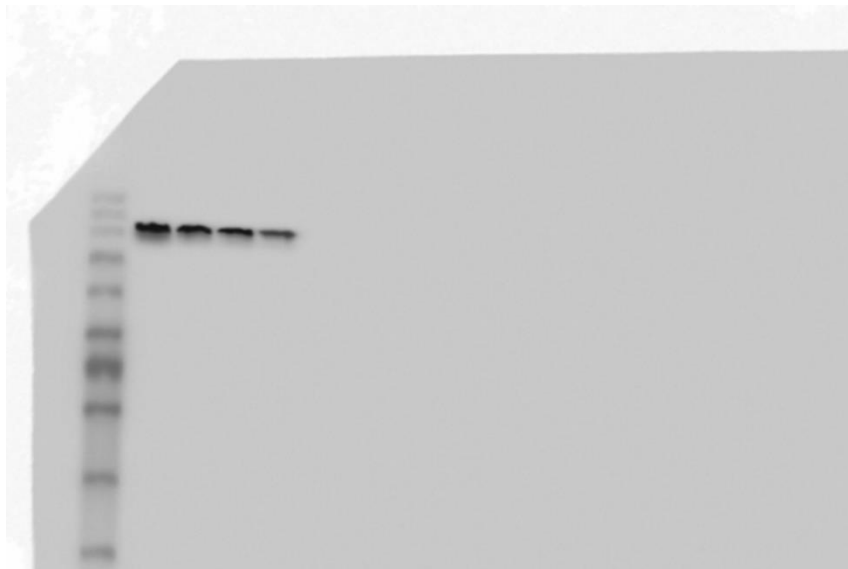

N-cadherin 140kDa-

GAPDH—U343-R (Figure3)

GAPDH 36kDa-

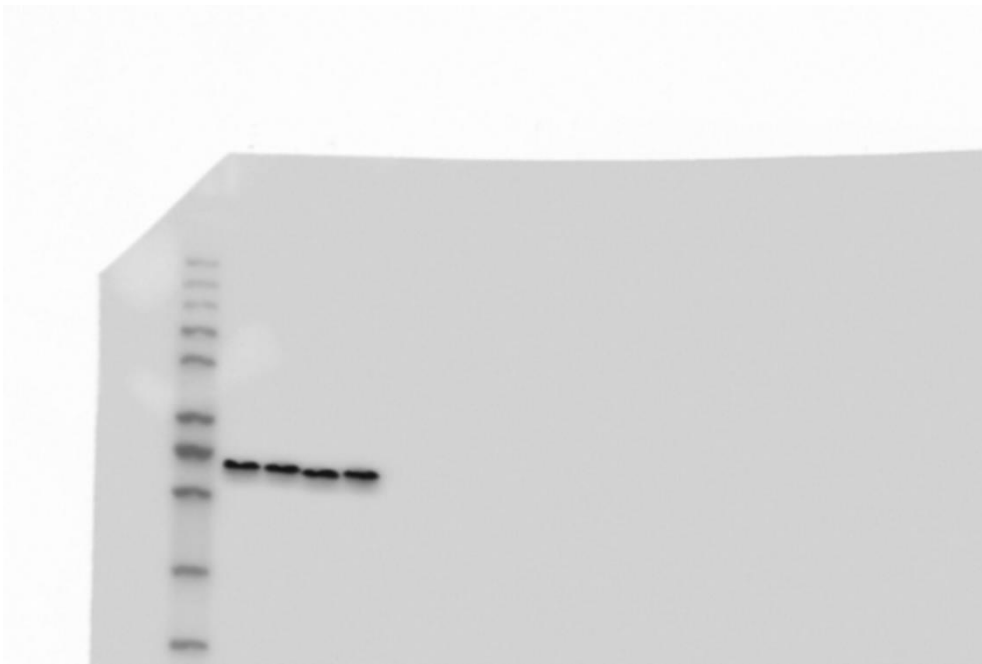

GAPDH—U251-R (Figure3)

GAPDH 36kDa-

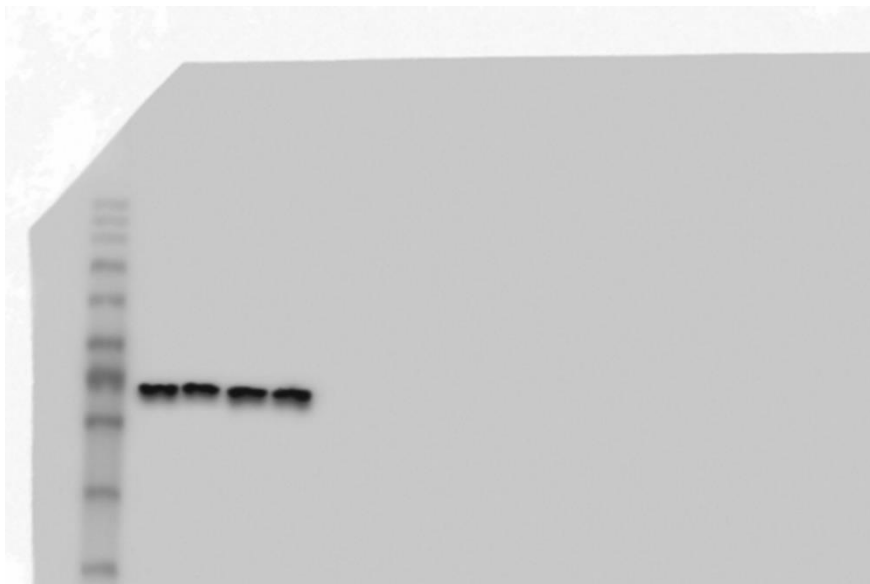

MGMT—U343-R (Figure3)

MGMT 22kDa-

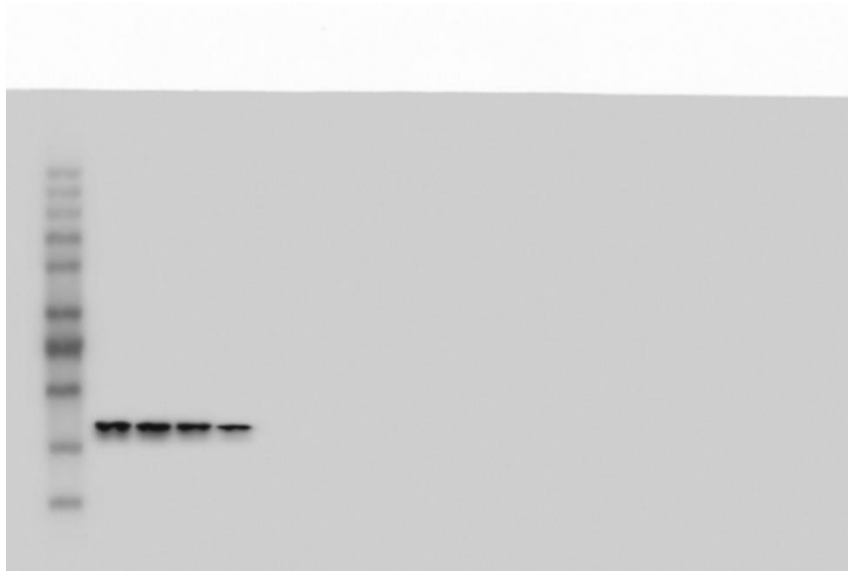

MGMT—U251-R (Figure3)

MGMT 22kDa-

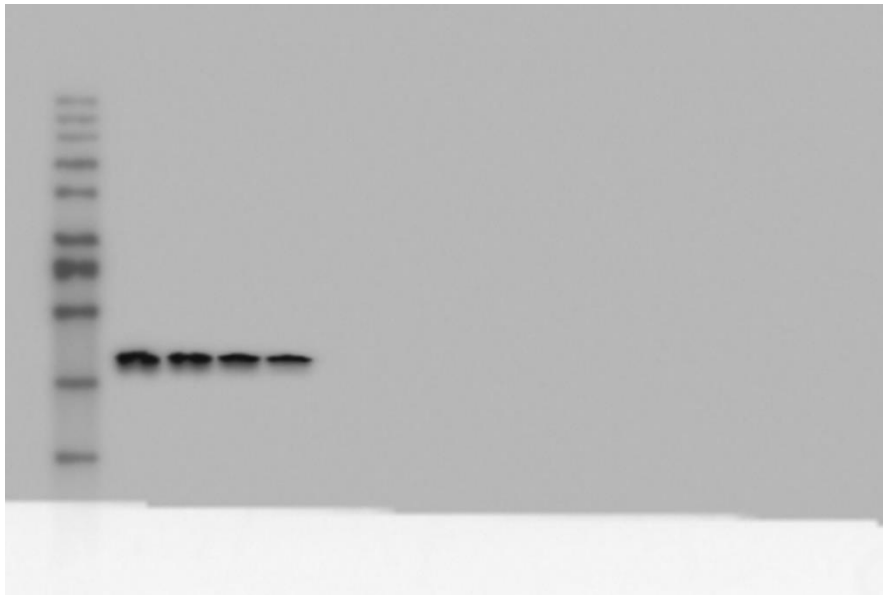



GAPDH—U343-R (Figure3)

GAPDH 36kDa-

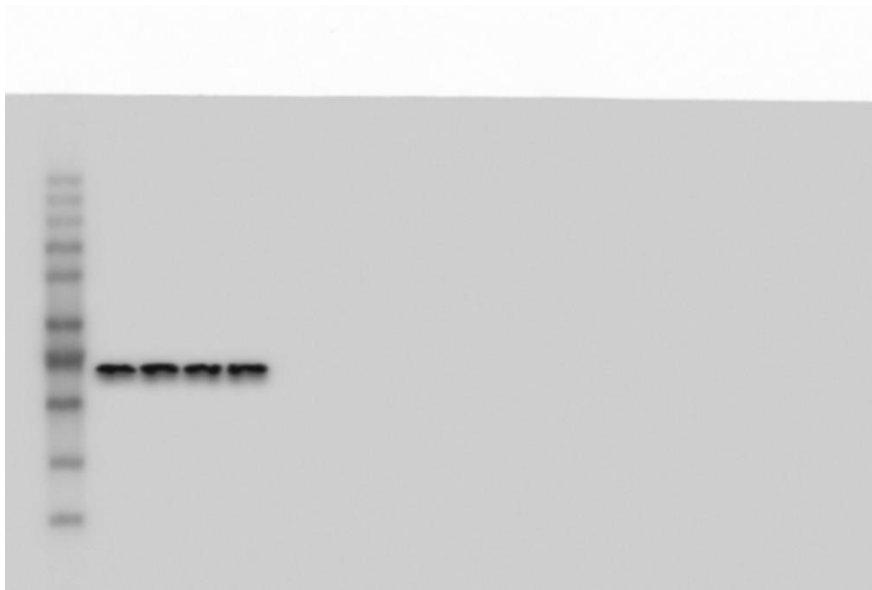

GAPDH—U251-R (Figure3)

GAPDH 36kDa-

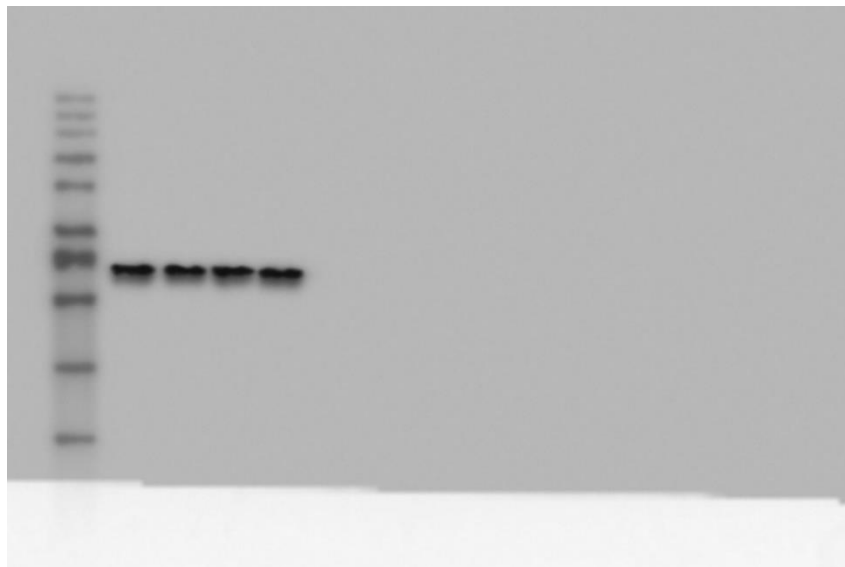

MGMT—U343-R (Figure4)

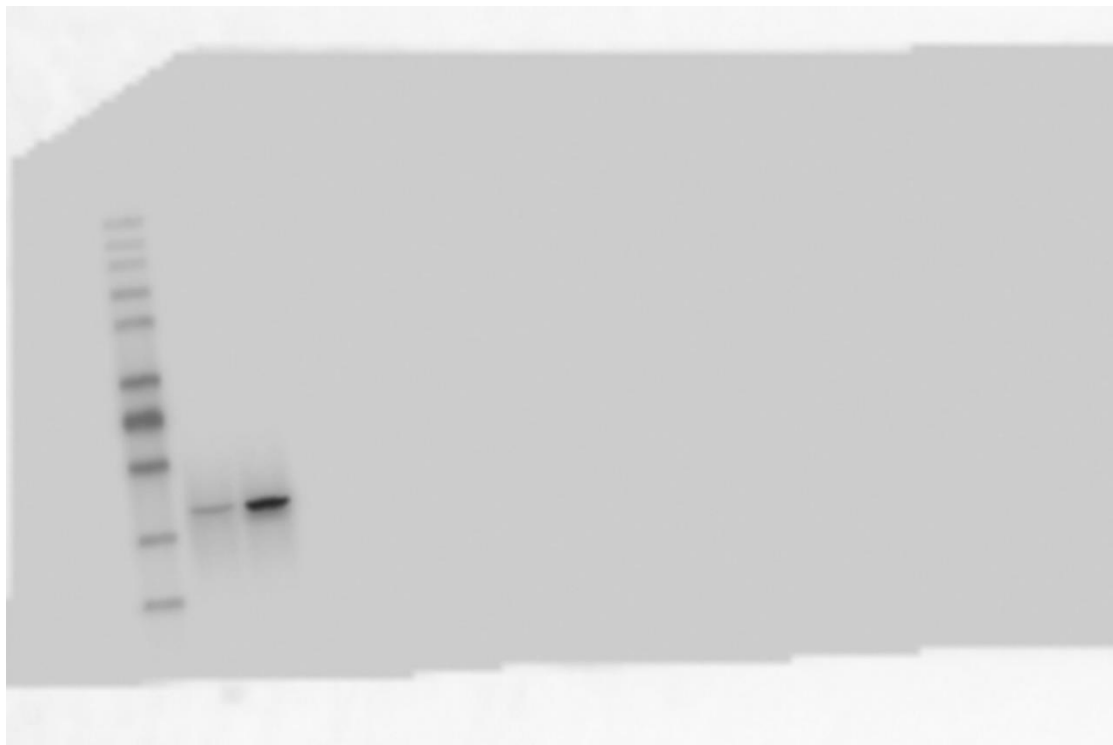

MGMT 22kDa-

MGMT—U251-R (Figure4)

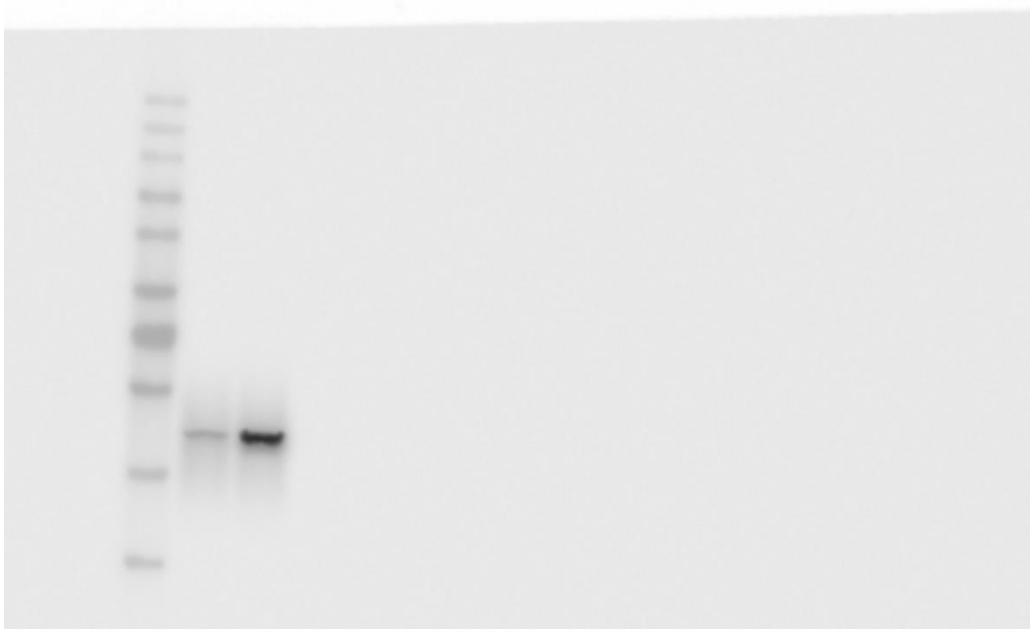

MGMT 22kDa-

$\beta$ -actin—U343-R (Figure4)

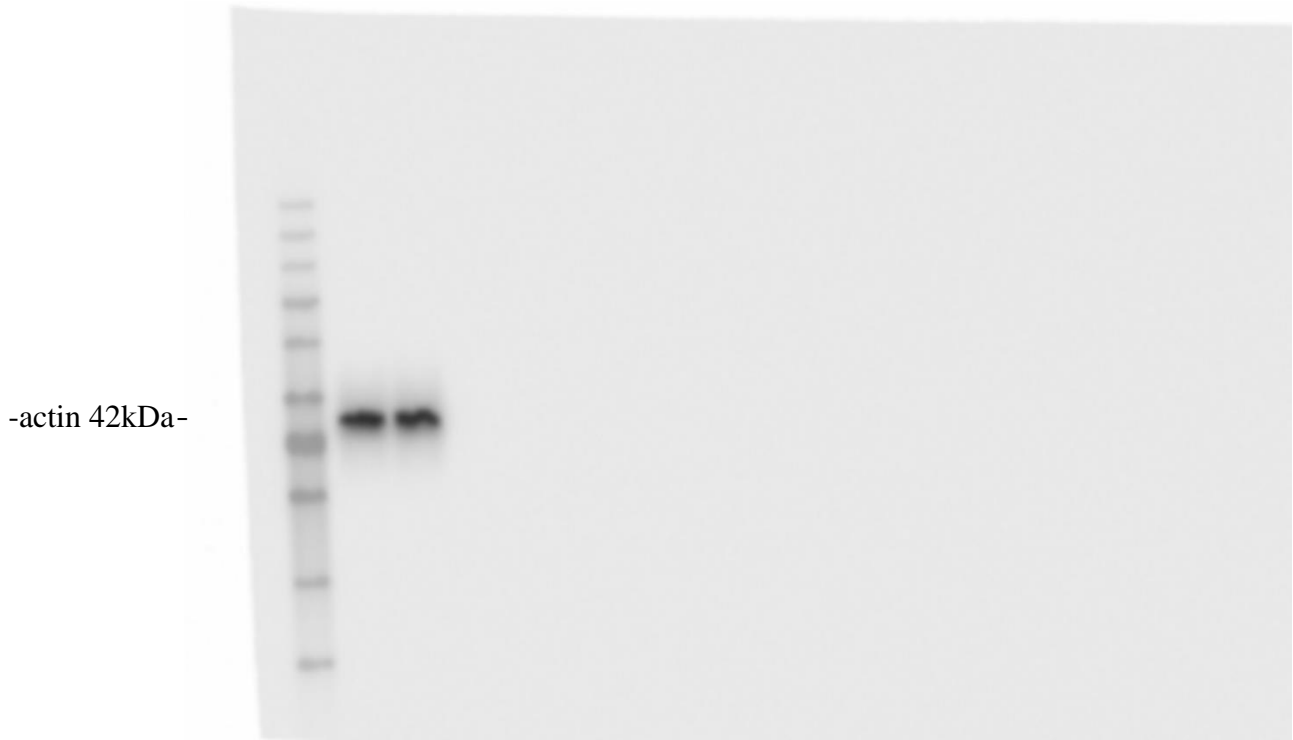

$\beta$ -actin—U343-R (Figure4)

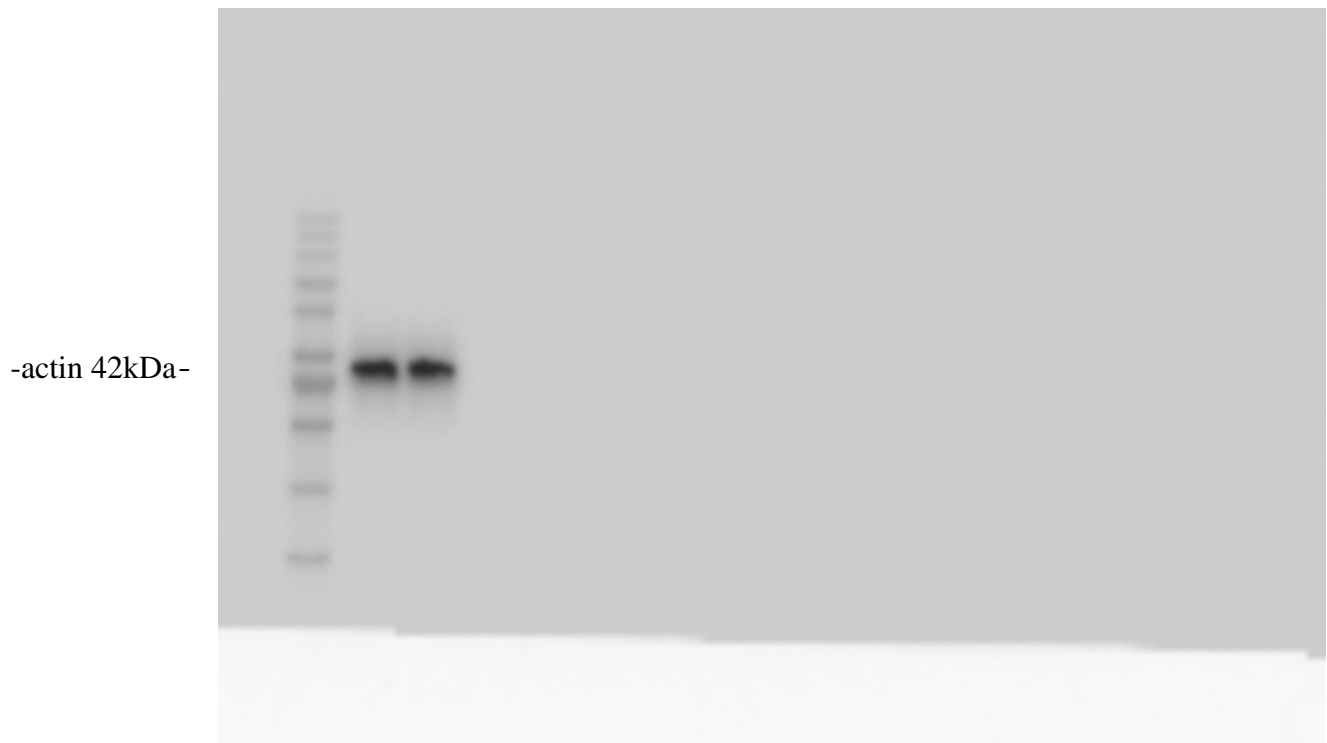

MGMT (Figure6)

MGMT 22kDa-

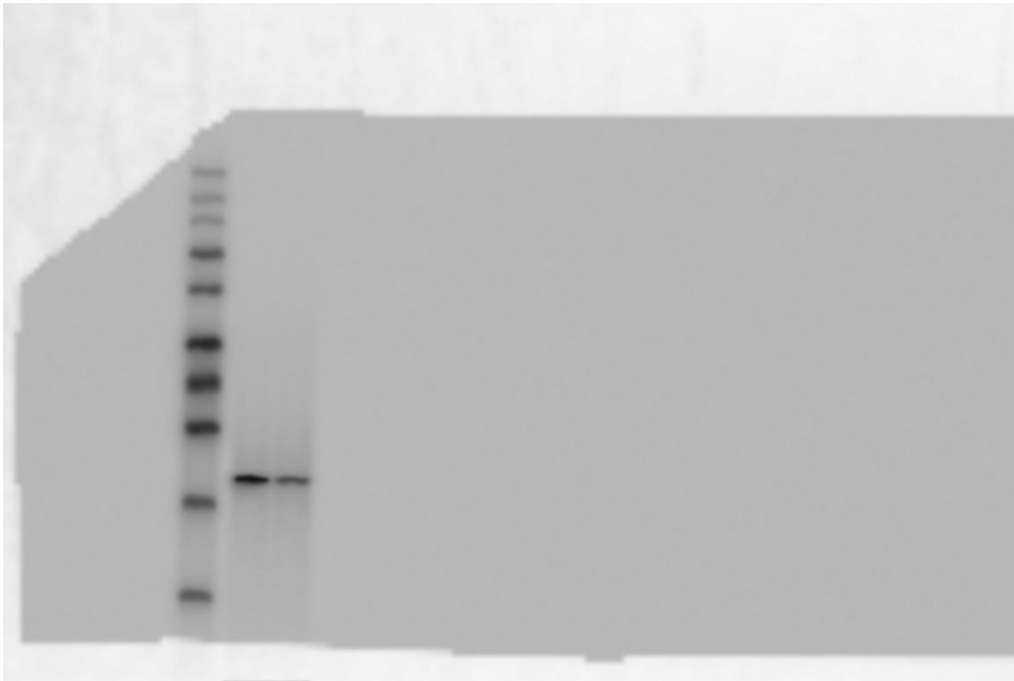

GAPDH (Figure6)

GAPDH 36kDa-

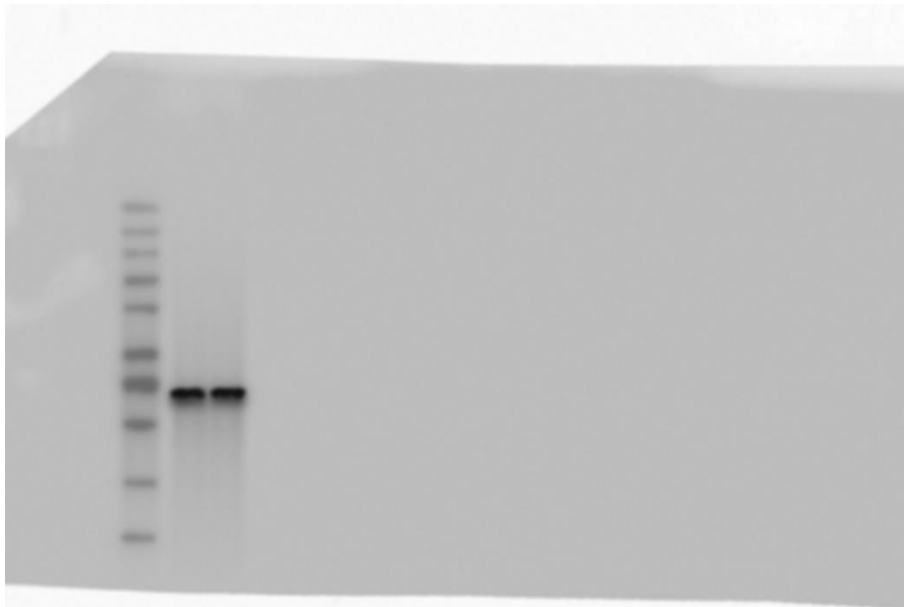

PCNA—U343-R (Figure S3)

PCNA 36kDa-

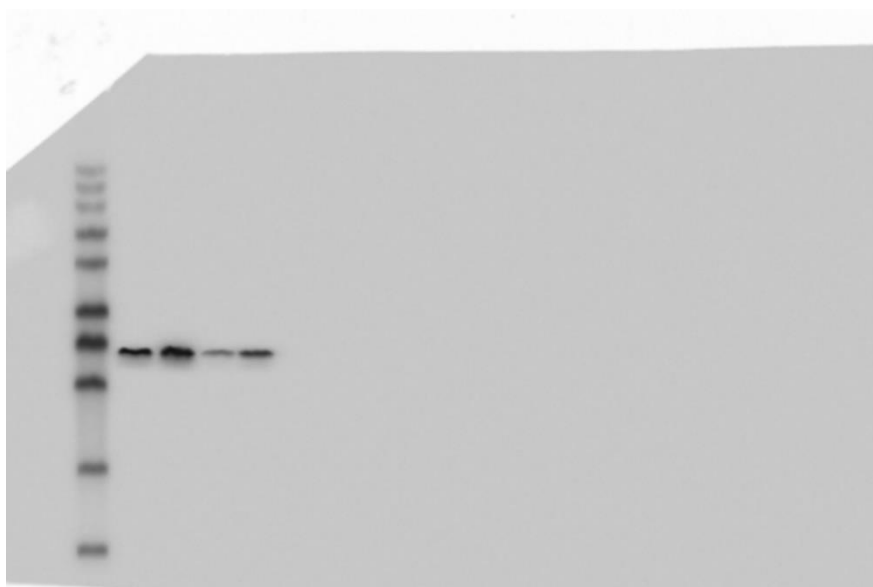

PCNA—U251-R (Figure S3)

PCNA 36kDa-

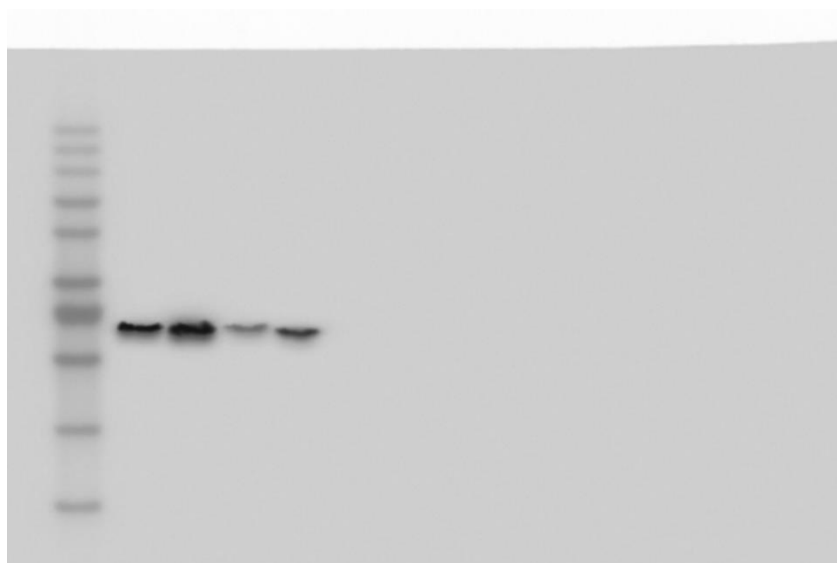

GAPDH—U343-R (Figure S3)

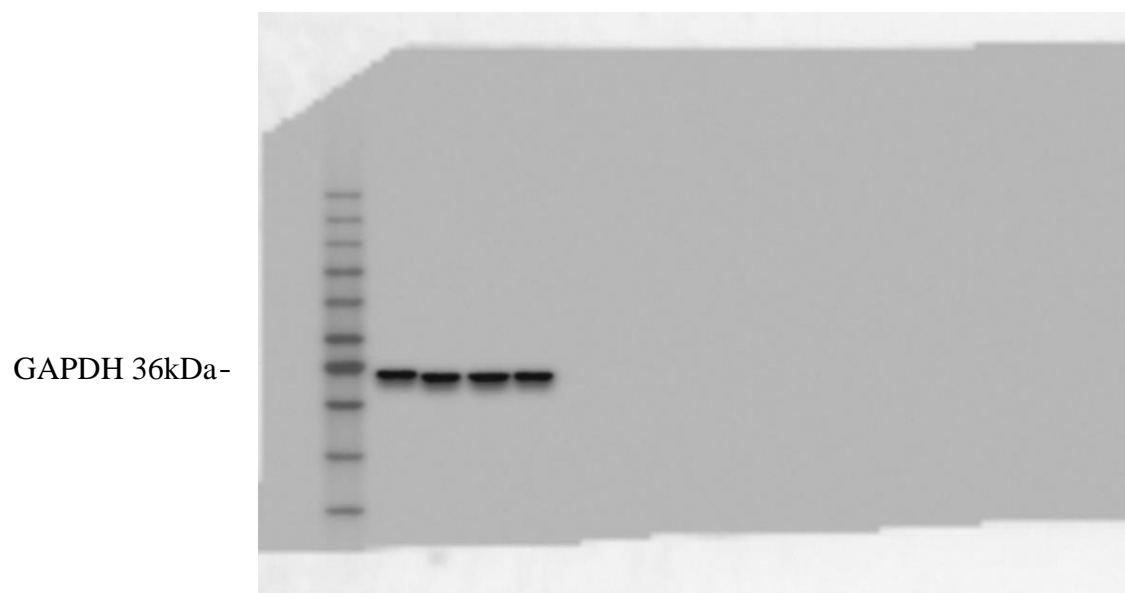

GAPDH—U251-R (Figure S3)

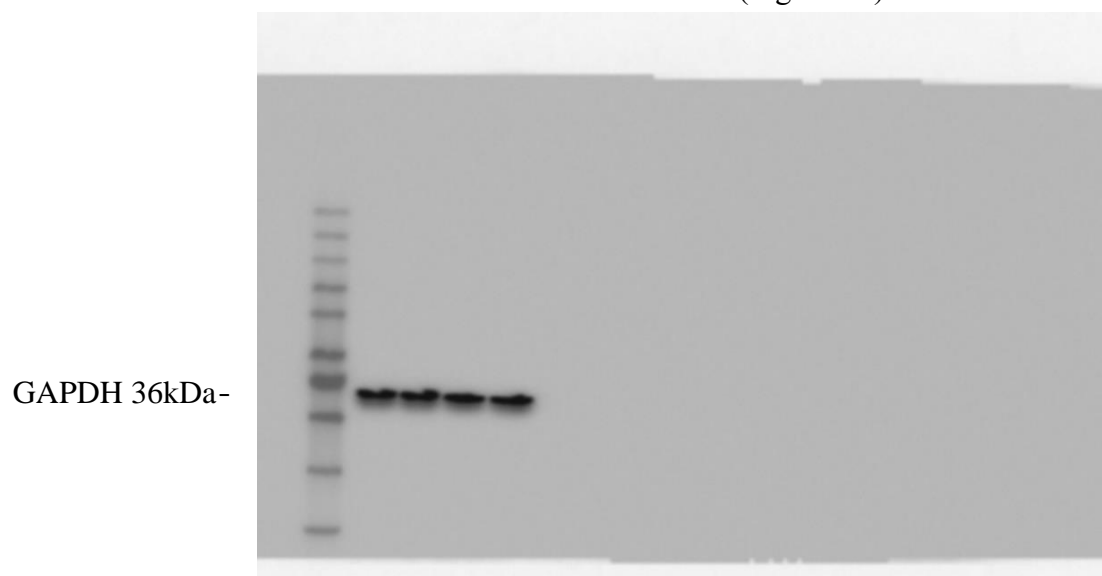

E-cadherin—U343-R (Figure S3)

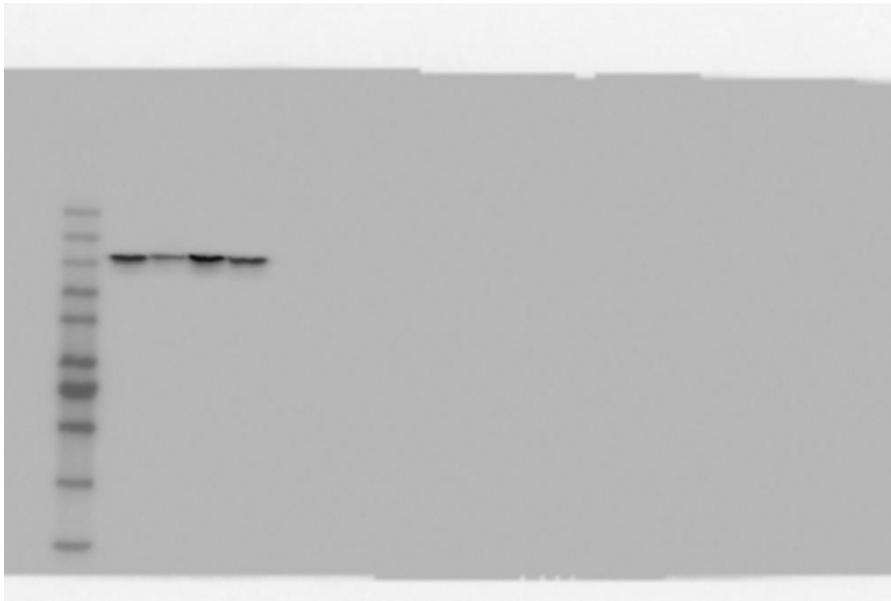

E-cadherin—U251-R (Figure S3)

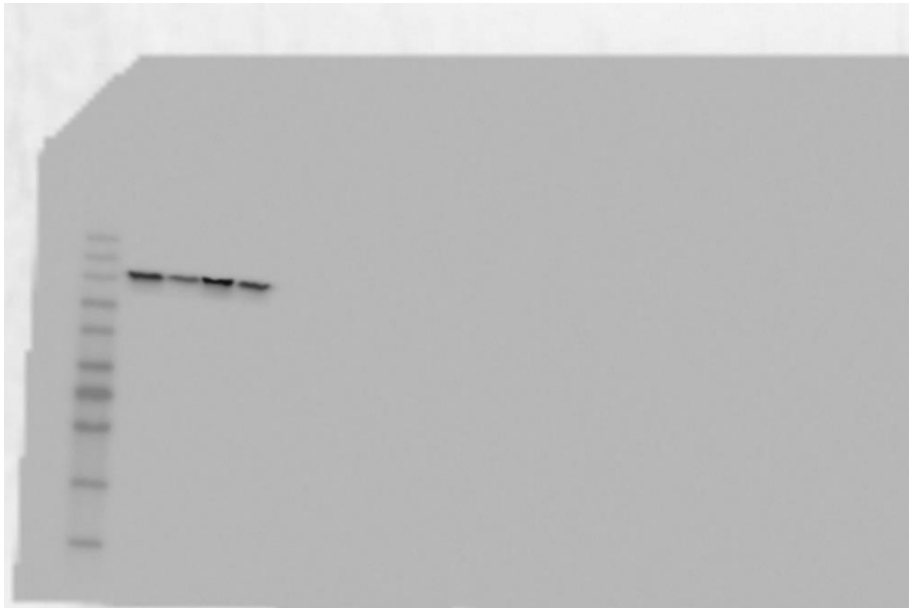

GAPDH—U343-R (Figure S3)

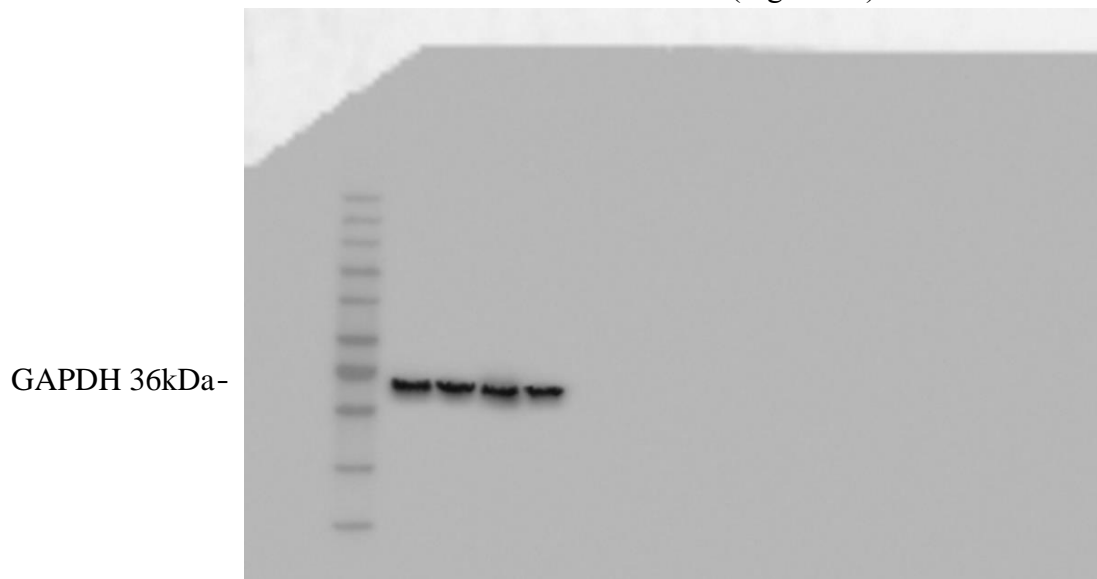

GAPDH—U251-R (Figure S3)

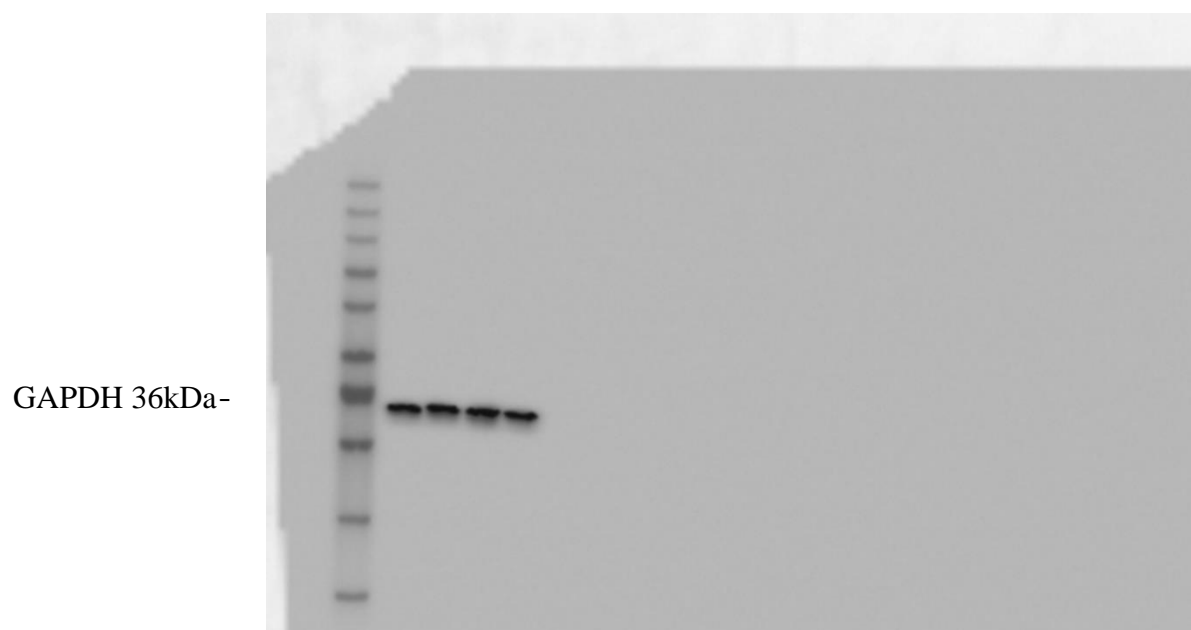



N-cadherin —U343-R (Figure S3)

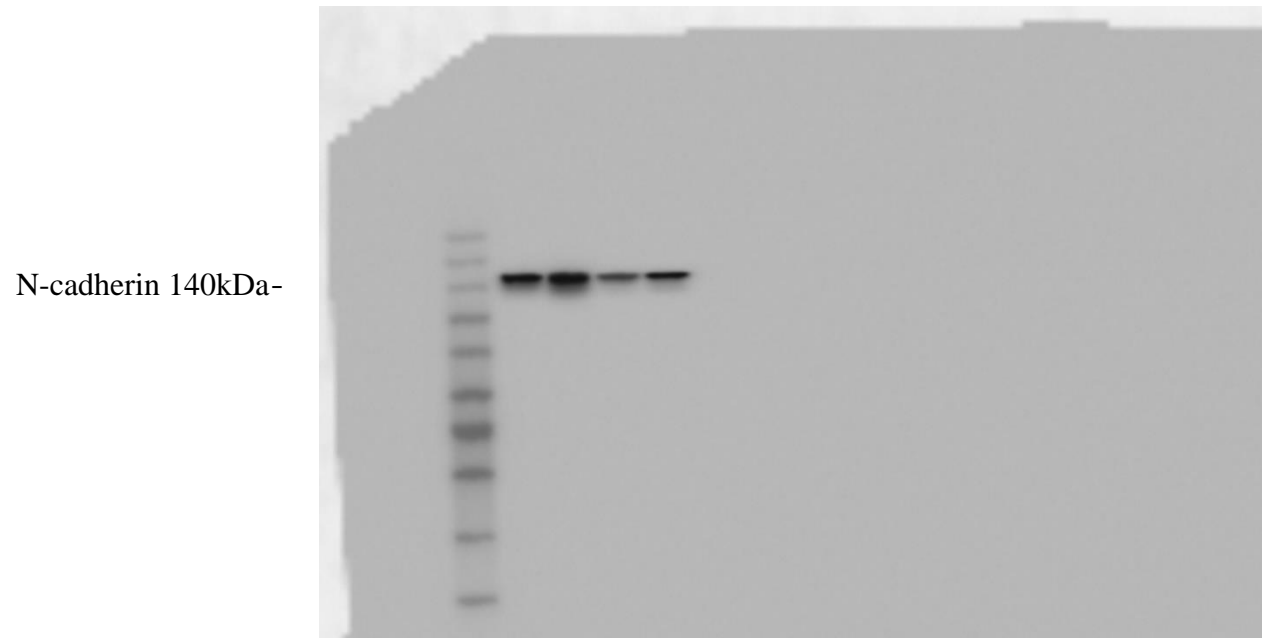

N-cadherin —U251-R (Figure S3)

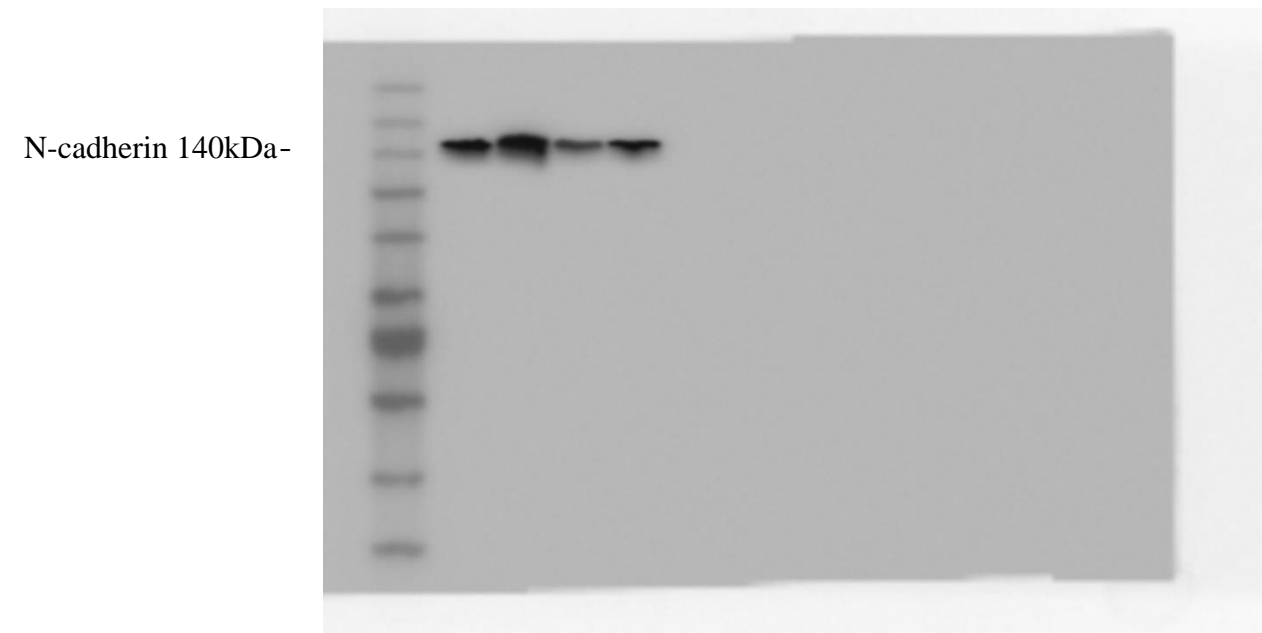

GAPDH—U343-R (Figure S3)

GAPDH 36kDa-

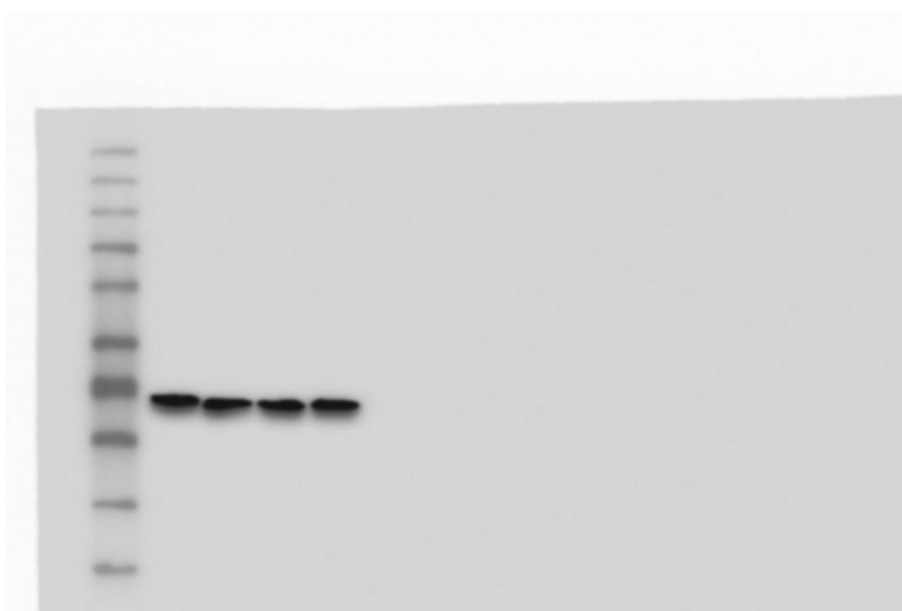

GAPDH—U251-R (Figure S3)

GAPDH 36kDa-

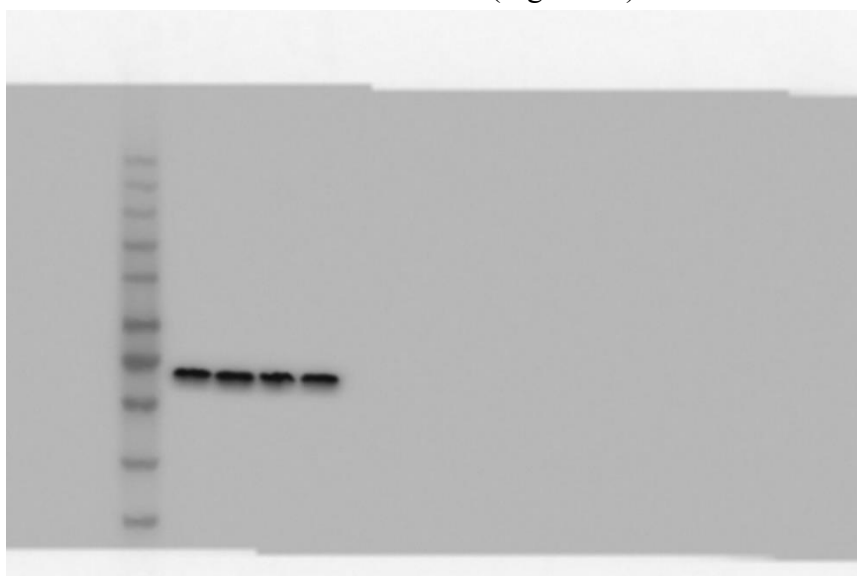

MGMT—U343-R (Figure S3)

MGMT 22kDa-

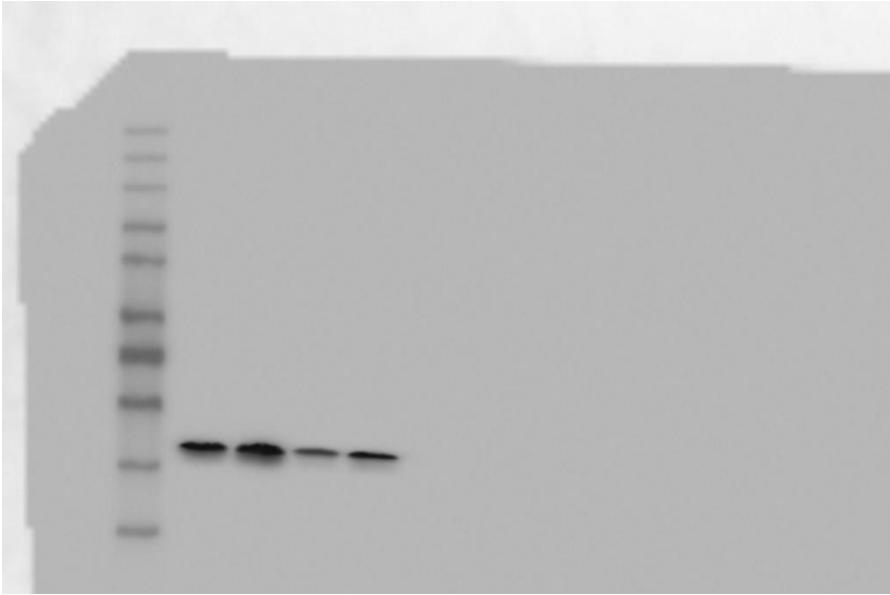

MGMT—U251-R (Figure S3)

MGMT 22kDa-

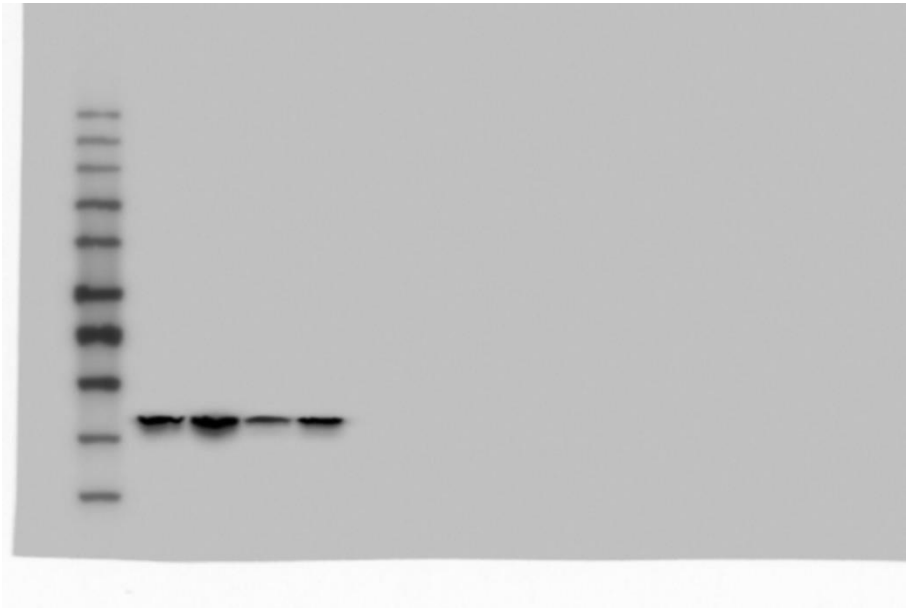

GAPDH—U343-R (Figure S3)

GAPDH 36kDa-

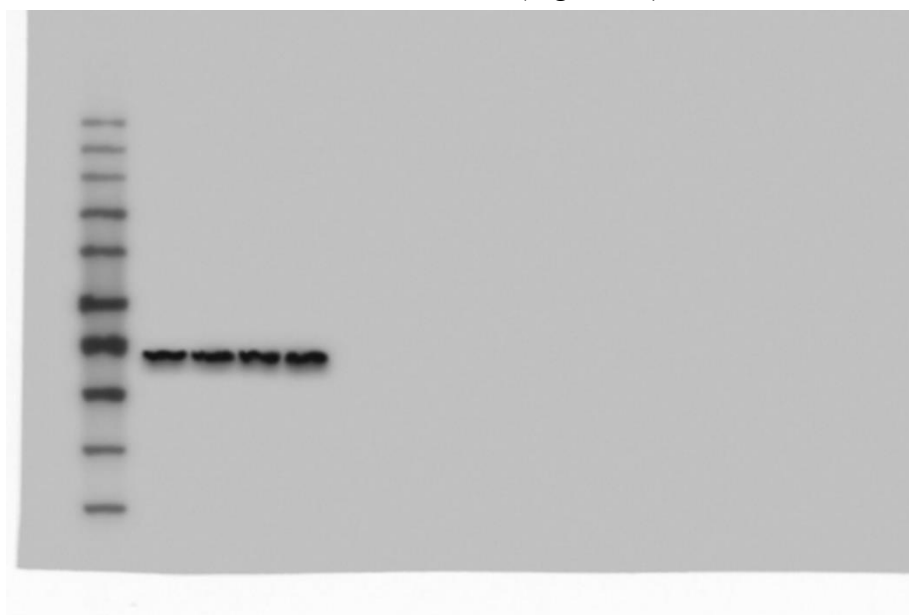

GAPDH—U251-R (Figure S3)

GAPDH 36kDa-

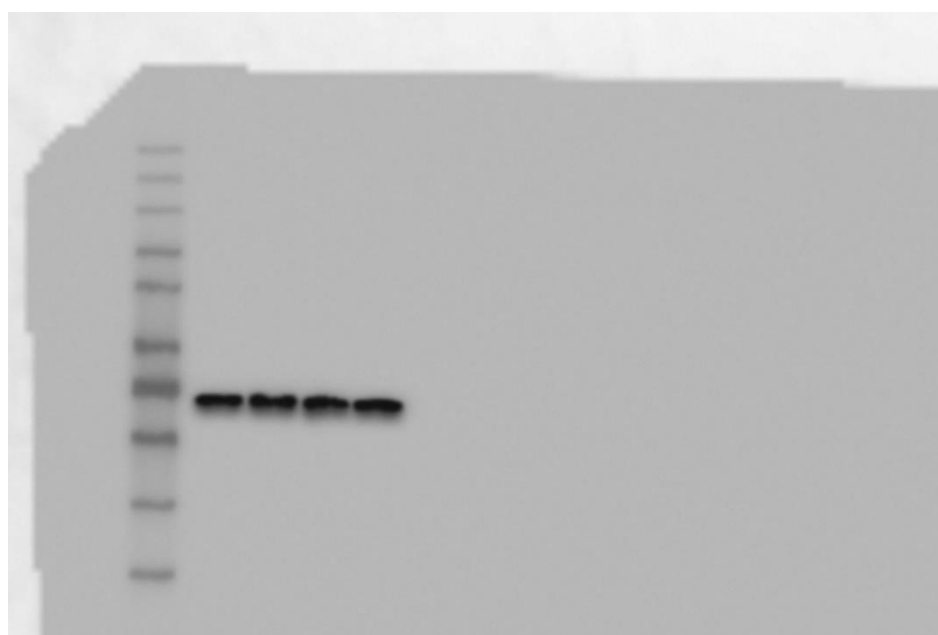

Supplement: 41419_2022_5056_MOESM7_ESM.pdf [file 41419_2022_5056_MOESM7_ESM.pdf]
