# Supplementary material for: Exosomal circWDR62 promotes temozolomide resistance and malignant progression through regulation of the miR-370-3p/MGMT axis in glioma
Source: PubMed Central journal article supplement (PMC9273787; doi:10.1038/s41419-022-05056-5), 2022-07-11
Supplement: 41419_2022_5056_MOESM8_ESM.pdf [file 41419_2022_5056_MOESM8_ESM.pdf]

This document certifies that the manuscript

## **Exosomal circWDR62 promotes temozolomide resistance and malignant progression through regulation of the miR-370-3p/MGMT axis in glioma**

prepared by the authors

**Xiuchao Geng, Yuhao Zhang, Xiaomeng Lin, Jun Hu, Zhaomu Zeng, Liangchao Hao,  
Jianglong Xu, Xinjuan Wang, Hong Wang, Qiang Li**

was edited for proper English language, grammar, punctuation, spelling, and overall style by one or more of the highly qualified native English speaking editors at AJE.

This certificate was issued on **February 11, 2022** and may be verified on the [AJE website](#) using the verification code **7AFB-566A-2EB3-17E1-628P**.

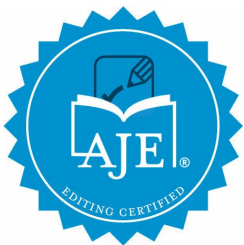

Neither the research content nor the authors' intentions were altered in any way during the editing process. Documents receiving this certification should be English-ready for publication; however, the author has the ability to accept or reject our suggestions and changes. To verify the final AJE edited version, please visit our verification page at [aje.com/certificate](#). If you have any questions or concerns about this edited document, please contact AJE at [support@aje.com](mailto:support@aje.com).
